# Supplementary material for: Extracellular microRNAs are dynamic non-vesicular biomarkers of muscle turnover
Source: PubMed Central journal article supplement (PMC3814379; doi:10.1093/nar/gkt724), 2013-08-14
Supplement: supp_gkt724_nar-01470-y-2013-File008.pdf [file supp_gkt724_nar-01470-y-2013-File008.pdf]

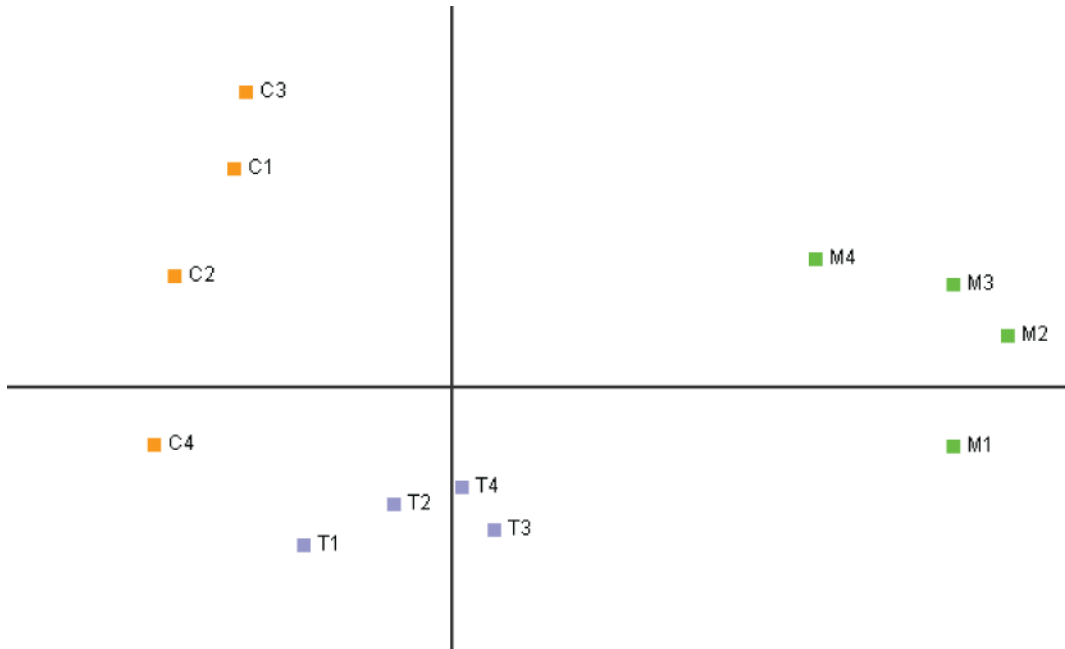

**Fig. S1**

**Principal component analysis of serum microRNA profile**

Principal component analysis was performed on  $\Delta\Delta\text{Ct}$  data from the miRCURY LNA SYBR Green RT-qPCR array for all miRNAs that were detected in all samples (123 assays). The first two components are shown representing a data reduction comprised of 82% of the data. Experimental groups cluster as expected. Samples are C57Bl/10 (C1-4), *mdx* (M1-4) and Pip6a-PMO treated *mdx* (T1-4). Treated samples cluster towards the C57Bl/10 control samples and away from the *mdx* samples.

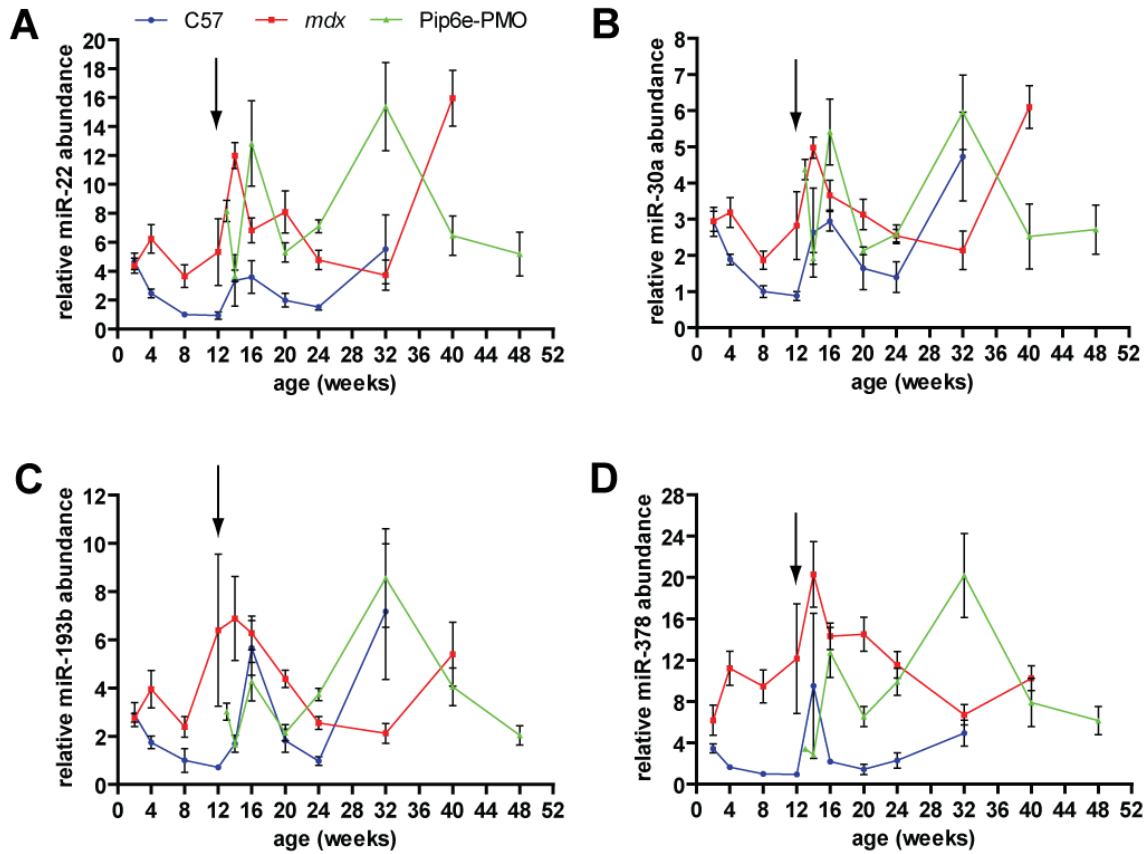

**Fig. S2**

**Time course of novel serum biomarker abundance**

Male C57Bl/10, *mdx* and Pip6e-PMO treated *mdx* mice were sacrificed at various ages and serum miRNA levels determined by small RNA TaqMan RT-qPCR. (A) miR-22, (B) miR-30a, (C) miR-193b and (D) miR-378 abundance was normalized to an external spike-in control. All miRNA expression data were normalized to the mean of the 8 week old C57Bl/10 group. Arrow indicates time of injection (single intravenous 12.5 mg/kg dose Pip6e-PMO).

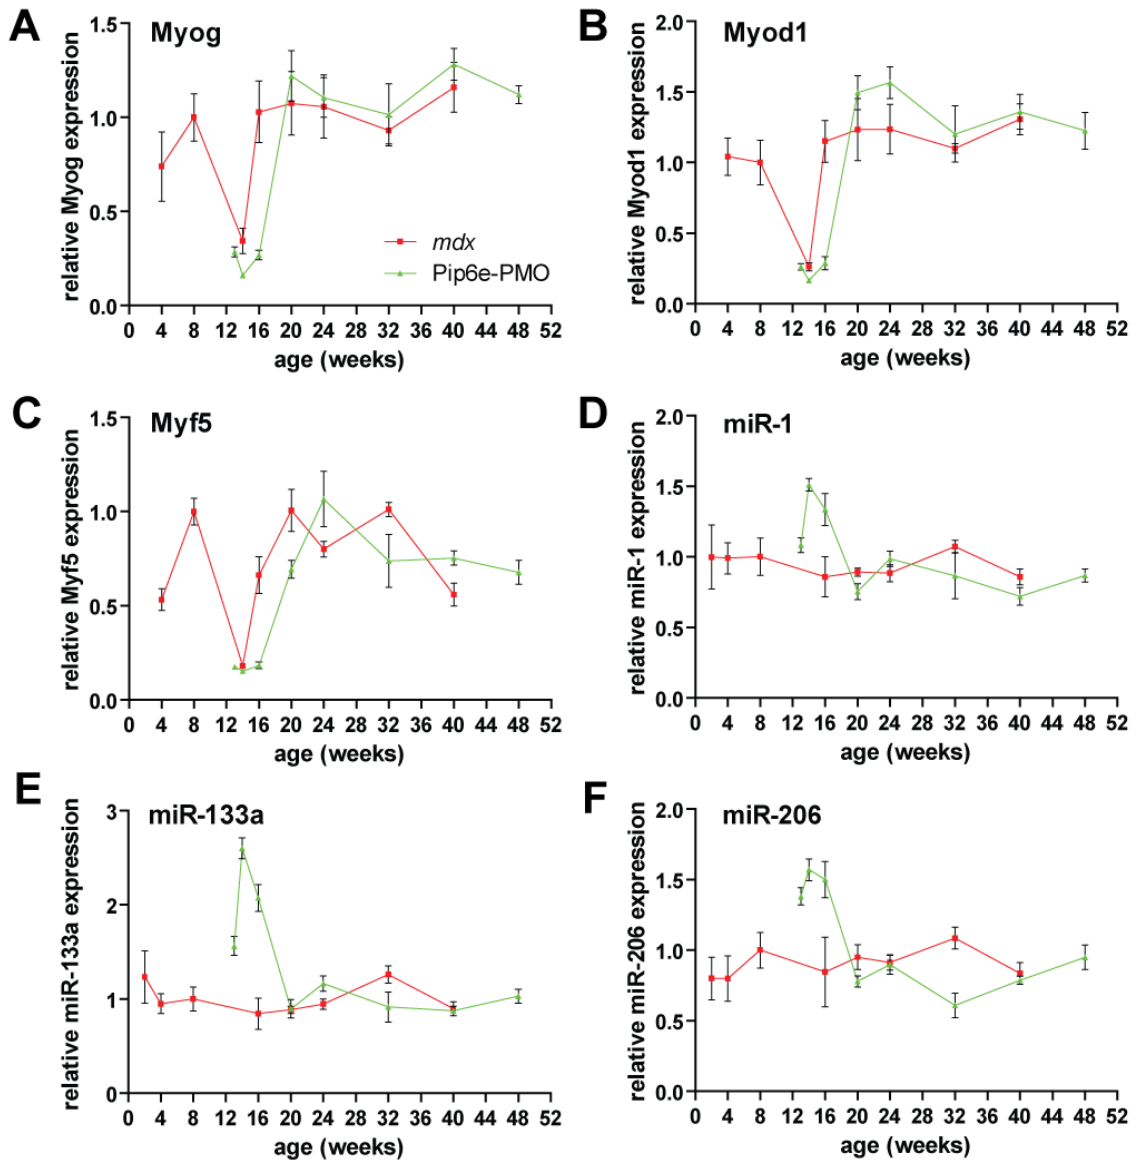

### **Fig. S3**

#### **Expression of myogenic transcription factors and dystromiRs in *mdx* diaphragm**

Diaphragm muscles from *mdx* and Pip6-e-PMO treated *mdx* mice were harvested at various time points and the expression of the myogenic transcription factors (A) Myog, (B) Myod1 and (C) Myf5 determined by RT-qPCR normalized to the geometric mean of the housekeeping genes Actb, Tbp, Rplp0 and Rpl10. Similarly, the same tissues were analyzed for expression of (D) miR-1, (E) miR-133a and (F) miR-206 by small RNA TaqMan RT-qPCR normalized to miR-16 expression. All values are mean + SEM, n=3-4.

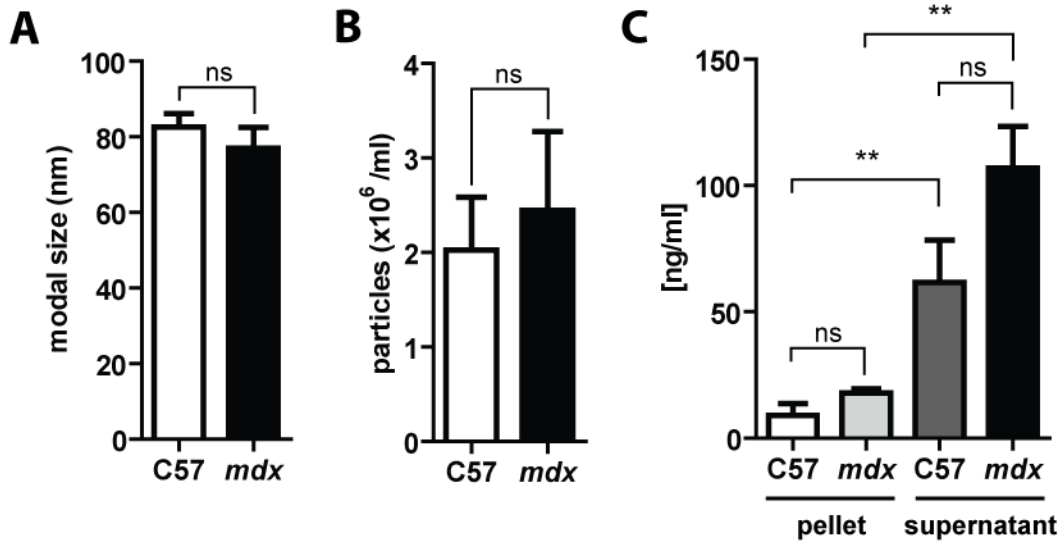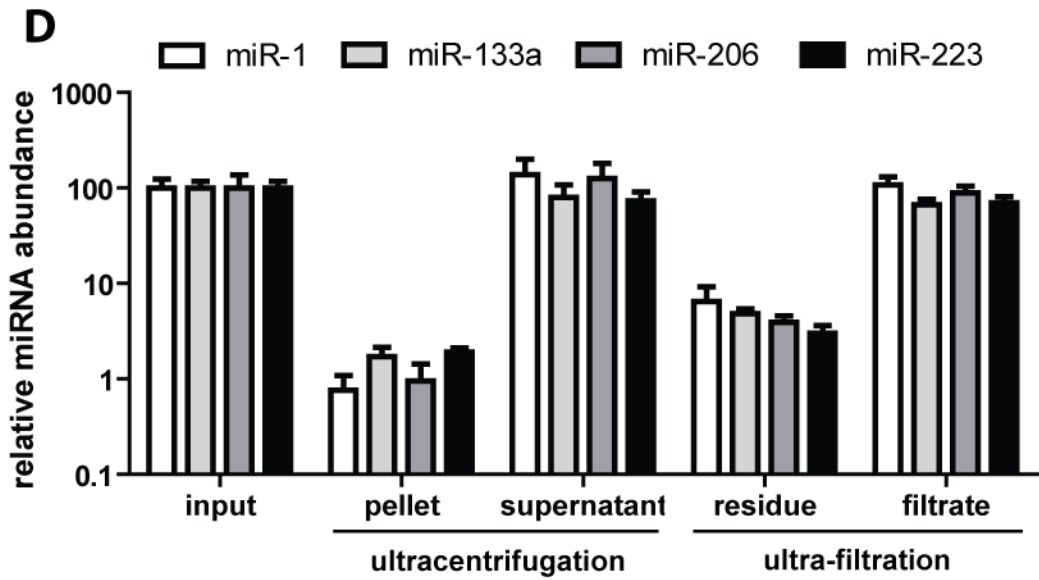

## **Fig. S4**

### **Characterization of extracellular vesicles from C57 and *mdx* serum**

C57Bl/10 and *mdx* serum separated by centrifugation at 30,000g for 1 hour and the modal size particle size (A) and particle counts (B) were determined for the resuspended pellets by nanoparticle tracking analysis. (C) Total RNA content of the pellet and supernatant fractions was determined by RiboGreen assay. (D) Separately, male *mdx* mice (n=3) were sacrificed, serum harvested and samples analyzed before freezing. Serum was separated by ultracentrifugation (100,000g for 1 hour) or ultra-filtration (1 Mda filters) and RNA extracted from each fraction. miRNA abundance was measured by small RNA TaqMan RT-qPCR and normalized to an external spike-in control oligonucleotide and compared to an unseparated 'input' fraction. All values are mean + SEM, n=3. \*\*p<0.01, 'ns' not significant.

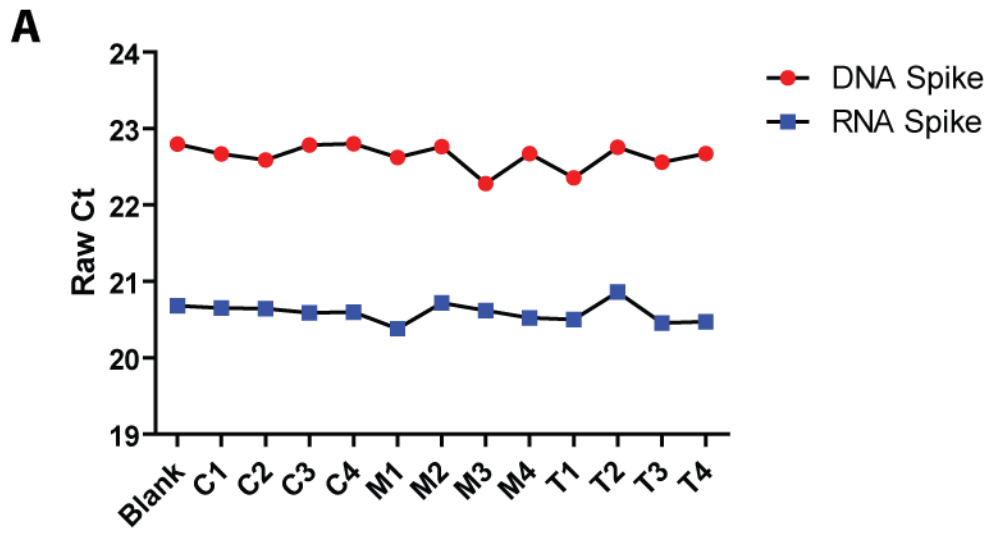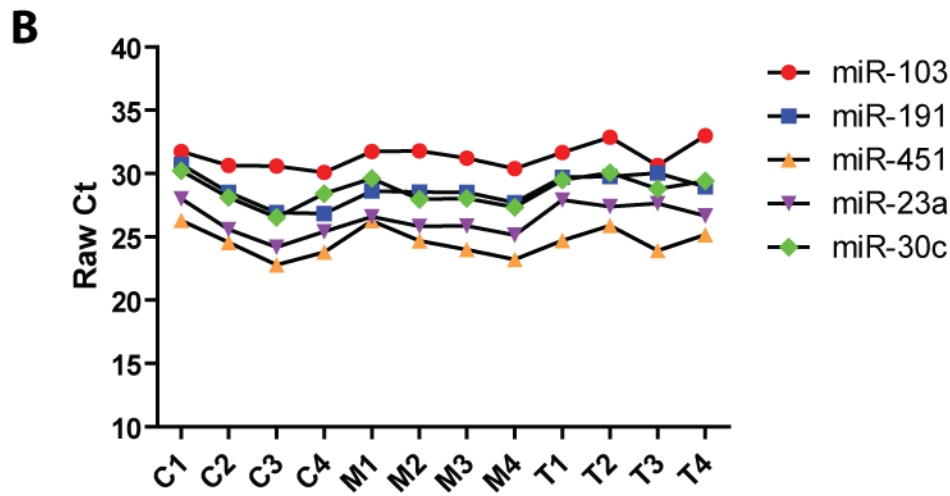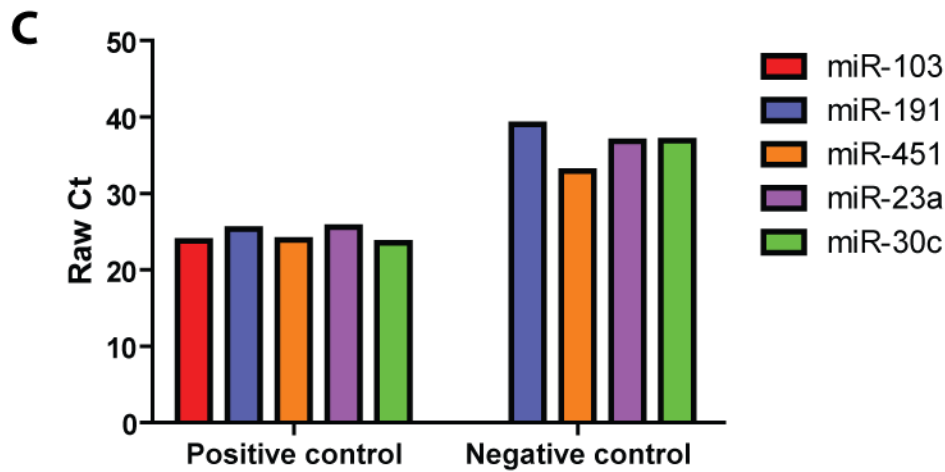

## **Fig. S5**

### **Serum microRNA profiling quality control**

(A) Spike-in control oligonucleotides were detected at similar Ct values across all samples and in the blank control indicating consistent RNA extraction and reverse transcription efficiencies between samples. Similarly, consistency in the Ct values for the RNA and DNA spike controls indicates that PCR-inhibiting contaminants were not co-purified with the RNA samples. (B) miRNAs commonly found in serum samples were present at similar levels across all samples indicating uniform quality. (C) Negative (no-template) control samples amplify >10 cycles later than positive control samples (or are undetected in the case of miR-103).



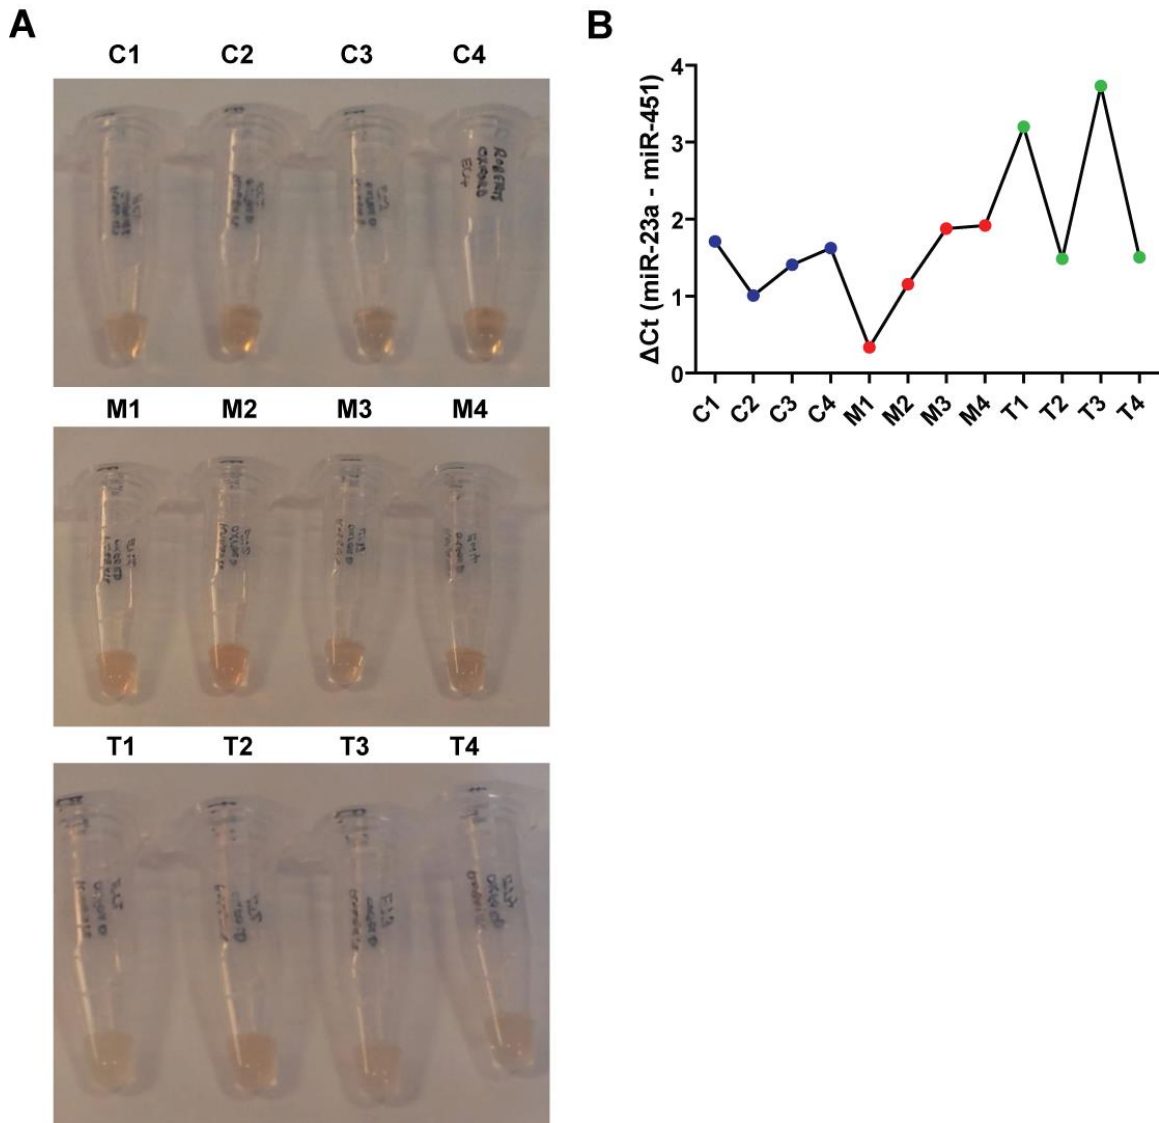

**Fig. S6**

**Assessment of hemolysis**

(A) None of the serum samples used for serum miRNA profiling appeared visibly hemolyzed. The Pip6a-PMO treated *mdx* samples (T1-T4) appear slightly lipemic. (B) The expression ratio of the erythrocyte-enriched miR-451 to non-erythrocyte enriched miR-23a was measured for each serum sample. Samples with ratios greater than 8 are considered hemolyzed.

|                    | Myog-TA | Myod1-TA | Myf5-TA | miR-1-TA | miR-133a-TA | miR-206-TA | Myog-Diaphragm | Myod1-Diaphragm | Myf5-Diaphragm | miR-1-Diaphragm | miR-133a-Diaphragm | miR-206-Diaphragm | miR-1-Serum | miR-133a-Serum | miR-206-Serum | miR-22-Serum | miR-30a-Serum | miR-193b-Serum | miR-378-Serum |
|--------------------|---------|----------|---------|----------|-------------|------------|----------------|-----------------|----------------|-----------------|--------------------|-------------------|-------------|----------------|---------------|--------------|---------------|----------------|---------------|
| Myog-TA            | -       | 0.11     | 0.32    | 0.38     | 0.47        | 0.71       | 0.00           | 0.10            | 0.10           | 0.06            | 0.14               | 0.25              | 0.16        | 0.13           | 0.40          | 0.19         | 0.04          | 0.09           | 0.15          |
| Myod1-TA           | 0.11    | -        | 0.04    | 0.19     | 0.59        | 0.25       | 0.01           | 0.04            | 0.29           | 0.01            | 0.24               | 0.13              | 0.16        | 0.09           | 0.11          | 0.35         | 0.28          | 0.11           | 0.13          |
| Myf5-TA            | 0.32    | 0.04     | -       | 0.75     | 0.32        | 0.36       | 0.64           | 0.61            | 0.45           | 0.59            | 0.44               | 0.42              | 0.29        | 0.21           | 0.04          | 0.25         | 0.05          | 0.14           | 0.20          |
| miR-1-TA           | 0.38    | 0.19     | 0.75    | -        | 0.58        | 0.16       | 0.45           | 0.43            | 0.33           | 0.45            | 0.30               | 0.18              | 0.28        | 0.34           | 0.07          | 0.27         | 0.06          | 0.15           | 0.26          |
| miR-133a-TA        | 0.47    | 0.59     | 0.32    | 0.58     | -           | 0.44       | 0.09           | 0.08            | 0.09           | 0.08            | 0.30               | 0.27              | 0.07        | 0.04           | 0.15          | 0.41         | 0.22          | 0.04           | 0.08          |
| miR-206-TA         | 0.71    | 0.25     | 0.36    | 0.16     | 0.44        | -          | 0.05           | 0.17            | 0.04           | 0.08            | 0.21               | 0.10              | 0.00        | 0.11           | 0.33          | 0.31         | 0.03          | 0.04           | 0.19          |
| Myog-Diaphragm     | 0.00    | 0.01     | 0.64    | 0.45     | 0.09        | 0.05       | -              | 0.93            | 0.54           | 0.89            | 0.70               | 0.66              | 0.04        | 0.04           | 0.14          | 0.03         | 0.12          | 0.05           | 0.04          |
| Myod1-Diaphragm    | 0.10    | 0.04     | 0.61    | 0.43     | 0.08        | 0.17       | 0.93           | -               | 0.65           | 0.79            | 0.61               | 0.68              | 0.17        | 0.09           | 0.08          | 0.09         | 0.10          | 0.07           | 0.06          |
| Myf5-Diaphragm     | 0.10    | 0.29     | 0.45    | 0.33     | 0.09        | 0.04       | 0.54           | 0.65            | -              | 0.25            | 0.29               | 0.21              | 0.10        | 0.09           | 0.04          | 0.26         | 0.39          | 0.09           | 0.11          |
| miR-1-Diaphragm    | 0.06    | 0.01     | 0.59    | 0.45     | 0.08        | 0.08       | 0.89           | 0.79            | 0.25           | -               | 0.89               | 0.79              | 0.32        | 0.36           | 0.18          | 0.31         | 0.13          | 0.39           | 0.30          |
| miR-133a-Diaphragm | 0.14    | 0.24     | 0.44    | 0.30     | 0.30        | 0.21       | 0.70           | 0.61            | 0.29           | 0.89            | -                  | 0.68              | 0.44        | 0.55           | 0.43          | 0.28         | 0.12          | 0.53           | 0.53          |
| miR-206-Diaphragm  | 0.25    | 0.13     | 0.42    | 0.18     | 0.27        | 0.10       | 0.66           | 0.68            | 0.21           | 0.79            | 0.68               | -                 | 0.35        | 0.26           | 0.26          | 0.24         | 0.19          | 0.41           | 0.29          |
| miR-1-Serum        | 0.16    | 0.16     | 0.29    | 0.28     | 0.07        | 0.00       | 0.04           | 0.17            | 0.10           | 0.32            | 0.44               | 0.35              | -           | 0.80           | 0.79          | 0.65         | 0.56          | 0.61           | 0.79          |
| miR-133a-Serum     | 0.13    | 0.09     | 0.21    | 0.34     | 0.04        | 0.11       | 0.04           | 0.09            | 0.09           | 0.36            | 0.55               | 0.26              | 0.80        | -              | 0.90          | 0.65         | 0.56          | 0.86           | 0.94          |
| miR-206-Serum      | 0.40    | 0.11     | 0.04    | 0.07     | 0.15        | 0.33       | 0.14           | 0.08            | 0.04           | 0.18            | 0.43               | 0.26              | 0.79        | 0.90           | -             | 0.54         | 0.60          | 0.78           | 0.89          |
| miR-22-Serum       | 0.19    | 0.35     | 0.25    | 0.27     | 0.41        | 0.31       | 0.03           | 0.09            | 0.26           | 0.31            | 0.28               | 0.24              | 0.65        | 0.65           | 0.54          | -            | 0.87          | 0.78           | 0.57          |
| miR-30a-Serum      | 0.04    | 0.28     | 0.05    | 0.06     | 0.22        | 0.03       | 0.12           | 0.10            | 0.39           | 0.13            | 0.12               | 0.19              | 0.56        | 0.56           | 0.60          | 0.87         | -             | 0.75           | 0.56          |
| miR-193b-Serum     | 0.09    | 0.11     | 0.14    | 0.15     | 0.04        | 0.04       | 0.05           | 0.07            | 0.09           | 0.39            | 0.53               | 0.41              | 0.61        | 0.86           | 0.78          | 0.78         | 0.75          | -              | 0.84          |
| miR-378-Serum      | 0.15    | 0.13     | 0.20    | 0.26     | 0.08        | 0.19       | 0.04           | 0.06            | 0.11           | 0.30            | 0.53               | 0.29              | 0.79        | 0.94           | 0.89          | 0.57         | 0.56          | 0.84           | -             |

**Table S1**

**Correlation analysis of expression values of miRNAs and myogenic transcription factors in serum and tissues**

| <b>ID</b>                  | <b>sequence</b>                        |
|----------------------------|----------------------------------------|
| <b>Myf5-FWD</b>            | CACCTCCAAGTCTCTGAC                     |
| <b>Myf5-REV</b>            | ACATGCATTTGATACATCAGGAC                |
| <b>Myf5-PROBE</b>          | FAM-TGCCTGAATGTAACAGCCCT               |
| <b>Myod1-FWD</b>           | GCTCTGATGGCATGATGGAT                   |
| <b>Myod1-REV</b>           | GACACAGCCGCACTCTT                      |
| <b>Myod1-PROBE</b>         | FAM-ACGACACCGCCTACTACAGT               |
| <b>Myog-FWD</b>            | CGATCTCCGCTACAGAGG                     |
| <b>Myog-REV</b>            | CGCGAGCAAATGATCTCCT                    |
| <b>Myog-PROBE</b>          | FAM-CCAGTGAATGCAACTCCACAGC             |
| <b>Tbp-FWD</b>             | AAGAAAGGGAGAATCATGGACC                 |
| <b>Tbp-REV</b>             | GAGTAAGTCCTGTGCCGTAAG                  |
| <b>Rplp0-FWD</b>           | TGACATCGTCTTTAAACCCCG                  |
| <b>Rplp0-REV</b>           | TGTCTGCTCCCACAATGAAG                   |
| <b>Rpl10-FWD</b>           | TCATGTCCATCCGAACCAAG                   |
| <b>Rpl10-REV</b>           | GCATTAAACTTGGTGAAGCCC                  |
| <b>Dmd-exon22-23-FWD</b>   | AACATCAACTTCAGCCATCCA                  |
| <b>Dmd-exon22-23-REV</b>   | GAAACTTTCCTCCCAGTTGGT                  |
| <b>Dmd-exon22-23-PROBE</b> | HEX-AGTTTATTCATATGTTCTTCTAGCTTTTGGCAGC |
| <b>Dmd-exon20-21-FWD</b>   | TGACAATCTGTTGACTTCATCCT                |
| <b>Dmd-exon20-21-REV</b>   | CAGATGACAACACTACTCCGAA                 |
| <b>Dmd-exon20-21-PROBE</b> | FAM-CCAGTCTACCACCCTATCAGAGCCA          |

**Table S2**

**Sequences of RT-qPCR Primers and probes used in this study.**
